# Supplementary material for: The Relationship between Vitamin D Metabolites and Androgens in Women with Polycystic Ovary Syndrome
Source: PubMed Central journal article supplement (PMC7282251; doi:10.3390/nu12051219), 2020-04-26
Supplement: nutrients-12-01219-s001.pdf [file nutrients-12-01219-s001.pdf]

**Table 1.** Pearson's correlations between markers of vitamin D status, androgens and features of polycystic ovary syndrome.

|                                          | Body Fat (%)          | HOMA-IR #                 | hs-CRP (mg/L) #       |
|------------------------------------------|-----------------------|---------------------------|-----------------------|
| <b>Total 25(OH)D (nmol/L)</b>            | -0.139 (0.381)        | <b>-0.310 (0.046)</b>     | -0.231 (0.146)        |
| <b>Free 25(OH)D (pmol/L)</b>             | <b>-0.502 (0.001)</b> | <b>-0.582 (&lt;0.001)</b> | <b>-0.512 (0.001)</b> |
| <b>Bioavailable 25(OH)D (nmol/L)</b>     | -0.113 (0.493)        | 0.152 (0.355)             | 0.106 (0.526)         |
| <b>Vitamin D Binding Protein (ug/mL)</b> | 0.251 (0.113)         | 0.160 (0.319)             | <b>0.348 (0.028)</b>  |
| <b>Testosterone (nmol/L)</b>             | -0.004 (0.980)        | -0.022 (0.898)            | -0.075 (0.635)        |
| <b>SHBG (nmol/L)</b>                     | -0.101 (0.514)        | -0.159 (0.348)            | 0.068 (0.665)         |
| <b>FAI #</b>                             | 0.045 (0.772)         | 0.063 (0.712)             | -0.068 (0.666)        |

Correlation coefficient (P-value). #: Spearman's correlations. 25-hydroxyvitamin D: 25(OH)D; The homeostatic model assessment of insulin resistance: HOMA-IR; High-sensitivity C-reactive protein: hs-CRP; Sex Hormone-Binding Globulin: SHBG; Free Androgen Index: FAI. Bold values indicate statistical significance.

**Table 2.** Multivariable linear regression between markers of vitamin D status and androgens.

|                              | Total 25(OH)D (nmol/L)      | Free 25(OH)D (pmol/L)  | Bioavailable 25(OH)D (nmol/L) | Vitamin D Binding Protein (ug/mL) |
|------------------------------|-----------------------------|------------------------|-------------------------------|-----------------------------------|
| <b>Model 1</b>               |                             |                        |                               |                                   |
| <b>Testosterone (nmol/L)</b> | 0.002 (-0.010, 0.013)       | -0.009 (-0.048, 0.029) | 0.024 (-0.140, 0.188)         | 0.001 (-0.0005, 0.002)            |
| <b>SHBG (nmol/L)</b>         | 0.300 (-0.026, 0.626)       | 0.723 (-0.584, 2.031)  | -0.964 (-5.986, 4.058)        | -0.010 (-0.049, 0.030)            |
| <b>FAI</b>                   | -0.002 (-0.007, 0.003)      | -0.007 (-0.026, 0.011) | 0.013 (-0.059, 0.085)         | 0.0003 (-0.0003, 0.001)           |
| <b>Model 2</b>               |                             |                        |                               |                                   |
| <b>Testosterone (nmol/L)</b> | 0.008 (-0.003, 0.018)       | -0.020 (-0.066, 0.025) | 0.001 (-0.147, 0.149)         | 0.001 (-0.0003, 0.002)            |
| <b>SHBG (nmol/L)</b>         | <b>0.369 (0.021, 0.716)</b> | 0.795 (-0.774, 2.363)  | -1.275 (-6.427, 3.877)        | -0.005 (-0.049, 0.038)            |
| <b>FAI</b>                   | -0.002 (-0.007, 0.004)      | -0.008 (-0.030, 0.015) | 0.012 (-0.061, 0.086)         | 0.0003 (-0.0003, 0.001)           |
| <b>Model 3</b>               |                             |                        |                               |                                   |
| <b>Testosterone (nmol/L)</b> | 0.008 (-0.005, 0.020)       | -0.026 (-0.081, 0.030) | 0.095 (-0.076, 0.267)         | 0.001 (-0.0004, 0.002)            |
| <b>SHBG (nmol/L)</b>         | 0.405 (-0.007, 0.818)       | 1.114 (-0.872, 3.099)  | -1.297 (-7.583, 4.989)        | -0.010 (-0.060, 0.039)            |
| <b>FAI</b>                   | -0.003 (-0.009, 0.004)      | -0.014 (-0.043, 0.015) | 0.045 (-0.045, 0.135)         | 0.0003 (-0.0004, 0.001)           |

Values are unstandardized beta-coefficients (95% confidence intervals). Model 1 is adjusted for age. Model 2 is adjusted Model 1 plus body fat percentage. Model 3 is adjusted for Model 2 plus the homeostatic model assessment of insulin resistance (HOMA-IR). Free androgen index was log transformed. 25-hydroxyvitamin D: 25(OH)D; Sex Hormone-Binding Globulin: SHBG; Free Androgen Index: FAI. Bold values indicate statistical significance.
